# Supplementary material for: Reuse of malaria rapid diagnostic tests for amplicon deep sequencing to estimate Plasmodium falciparum transmission intensity in western Uganda
Source: PubMed Central journal article supplement (PMC6033881; doi:10.1038/s41598-018-28534-3), 2018-07-05

**Reuse of malaria rapid diagnostic tests for amplicon deep sequencing to estimate *Plasmodium falciparum* transmission intensity in Western Uganda.**

Ross M. Boyce<sup>1\*</sup>, Nick Hathaway<sup>2</sup>, Travis Fulton<sup>3</sup>, Raquel Reyes<sup>4</sup>, Michael Matte<sup>5</sup>, Moses Ntaro<sup>5</sup>, Edgar Mulogo<sup>5</sup>, Andreea Waltmann<sup>1</sup>, Jeffrey A. Bailey<sup>2</sup>, Mark J. Siedner<sup>6</sup>, and Jonathan J. Juliano<sup>1,3,7</sup>

<sup>1</sup>Division of Infectious Diseases, University of North Carolina at Chapel Hill, 130 Mason Farm Road, Chapel Hill, 27599, USA

<sup>2</sup>Program in Bioinformatics and Integrative Biology, University of Massachusetts, 368 Plantation St., Worcester, Massachusetts 01605, USA

<sup>3</sup>Division of Epidemiology, University of North Carolina at Chapel Hill Gillings School of Global Public Health, 135 Dauer Drive, Chapel Hill, 27599, USA

<sup>4</sup>Division of General Medicine & Clinical Epidemiology, University of North Carolina at Chapel Hill, 5039 Old Clinic Building, CB 7110, Chapel Hill, 27599, USA

<sup>5</sup>Department of Community Health, Mbarara University of Science & Technology, P.O. Box 1410, Mbarara, Uganda

<sup>6</sup>Department of Medicine, Harvard Medical School and Massachusetts General Hospital, 125 Nashua Street, Suite 722, Boston 02114, USA

<sup>7</sup>Curriculum in Genetics and Microbiology, University of North Carolina at Chapel Hill, 321 South Columbia Street, Chapel Hill, NC 27516, USA

\*Corresponding author:

Ross M. Boyce MD, MSc  
Division of Infectious Diseases  
University of North Carolina at Chapel Hill  
130 Mason Farm Road  
Chapel Hill, NC USA 27599  
Phone: 919.966.2537  
Fax: 919.966.6714  
[roboyce@med.unc.edu](mailto:roboyce@med.unc.edu)

**Table S1:** AMA primer and MID sequences

|                                          |                                            |
|------------------------------------------|--------------------------------------------|
| <b>Nested Forward Primer</b>             | 5'-GCTGAAGTAGCTGGACTCAA                    |
|                                          |                                            |
| <b>Conserved Reverse Primer</b>          | 5'-TTTCCTGCATGTCTTGAACA                    |
|                                          |                                            |
| <b>Inner Forward Primers with 5' MID</b> |                                            |
| MID01                                    | 5'- <b>ACGAGTGCGT</b> CCATCAGGGAAATGTCCAGT |
| MID02                                    | 5'- <b>ACGCTCGAC</b> CCATCAGGGAAATGTCCAGT  |
| MID03                                    | 5'- <b>AGACGCACT</b> CCATCAGGGAAATGTCCAGT  |
| MID04                                    | 5'- <b>AGCACTGTAG</b> CCATCAGGGAAATGTCCAGT |
| MID05                                    | 5'- <b>ATCAGACACG</b> CCATCAGGGAAATGTCCAGT |
| MID06                                    | 5'- <b>ATATCGCGAG</b> CCATCAGGGAAATGTCCAGT |
| MID07                                    | 5'- <b>CGTGTCTCTA</b> CCATCAGGGAAATGTCCAGT |
| MID08                                    | 5'- <b>CTCGCGTGT</b> CCATCAGGGAAATGTCCAGT  |
| MID10                                    | 5'- <b>TCTCTATGCG</b> CCATCAGGGAAATGTCCAGT |
| MID11                                    | 5'- <b>TGATACGTCT</b> CCATCAGGGAAATGTCCAGT |
| MID13                                    | 5'- <b>CATAGTAGTG</b> CCATCAGGGAAATGTCCAGT |
| MID14                                    | 5'- <b>CGAGAGATA</b> CCATCAGGGAAATGTCCAGT  |
| MID15                                    | 5'- <b>ATACGACGT</b> CCATCAGGGAAATGTCCAGT  |
| MID16                                    | 5'- <b>TCACGTA</b> CTACCATCAGGGAAATGTCCAGT |
| MID17                                    | 5'- <b>CGTCTAGT</b> ACCATCAGGGAAATGTCCAGT  |
| MID18                                    | 5'- <b>TCTACGTAG</b> CCATCAGGGAAATGTCCAGT  |
| MID19                                    | 5'- <b>TGTACTACT</b> CCATCAGGGAAATGTCCAGT  |
| MID20                                    | 5'- <b>ACGACTACAG</b> CCATCAGGGAAATGTCCAGT |
| MID21                                    | 5'- <b>CGTAGACTAG</b> CCATCAGGGAAATGTCCAGT |
| MID22                                    | 5'- <b>TACGAGTAT</b> GCCATCAGGGAAATGTCCAGT |
| MID23                                    | 5'- <b>TACTCTCGT</b> GCCATCAGGGAAATGTCCAGT |
| MID24                                    | 5'- <b>TAGAGACGAG</b> CCATCAGGGAAATGTCCAGT |

**Table S2:** Mean multiplicity of infection (MOI) by sub-group and ordinal logistic regression modeling of correlates of MOI

| Variable            | Mean MOI           | OR (95% CI)        | p-Value      | aOR (95% CI)       | p-Value      |
|---------------------|--------------------|--------------------|--------------|--------------------|--------------|
| <b>Sex</b>          |                    |                    |              |                    |              |
| Female              | 3.16 (2.65 – 3.67) | REF                | REF          | -                  | -            |
| Male                | 3.00 (2.51 – 3.49) | 0.89 (0.56 – 1.44) | 0.64         | -                  | -            |
| <b>Age Category</b> |                    |                    |              |                    |              |
| <5 years            | 2.82 (1.89 – 3.74) | REF                | REF          | REF                | REF          |
| 5 – 15 years        | 3.05 (2.56 – 3.54) | 1.47 (0.73 – 2.93) | 0.28         | 1.29 (0.51 – 3.26) | 0.60         |
| >15 years           | 3.26 (2.67 – 3.86) | 1.64 (0.81 – 3.33) | 0.17         | 1.28 (0.48 – 3.39) | 0.63         |
| <b>Parasitemia</b>  |                    |                    |              |                    |              |
| <2,500/μl           | 3.51 (2.55 – 4.47) | REF                | REF          | -                  | -            |
| 2,500 – 9,999/μl    | 3.52 (2.75 – 4.29) | 1.22 (0.53 – 2.84) | 0.64         | -                  | -            |
| 10,000 – 99,000/μl  | 2.80 (2.34 – 3.27) | 0.96 (0.45 – 2.06) | 0.91         | -                  | -            |
| ≥100,000/μl         | 2.47 (1.79 – 3.15) | 0.77 (0.32 – 1.85) | 0.56         | -                  | -            |
| <b>Severity</b>     |                    |                    |              |                    |              |
| Uncomplicated       | 3.25 (2.86 – 3.64) | REF                | REF          | REF                | REF          |
| Severe              | 2.29 (1.46 – 3.12) | 0.56 (0.27 – 1.16) | 0.12         | 0.63 (0.25 – 1.60) | 0.33         |
| <b>Elevation*</b>   |                    |                    |              |                    |              |
| Quartile 1          | 3.51 (2.77 – 4.26) | REF                | REF          | REF                | REF          |
| Quartile 2          | 2.70 (2.08 – 3.33) | 0.51 (0.23 – 1.12) | 0.09         | 0.43 (0.20 – 0.94) | <b>0.035</b> |
| Quartile 3          | 2.62 (2.06 – 3.19) | 0.49 (0.22 – 1.08) | 0.08         | 0.44 (0.20 – 0.98) | <b>0.045</b> |
| Quartile 4          | 1.85 (1.33 – 2.37) | 0.24 (0.10 – 0.57) | <b>0.001</b> | 0.23 (0.09 – 0.59) | <b>0.002</b> |

Elevation ranges: Quartile 1 = 1136 – 1225m, Quartile 2 = 1259 – 1339m, Quartile 3 = 1355 – 1424m, Quartile 4 = 1451 – 1830m

Abbreviations: OR = odds ratio, aOR = adjusted odds ratio

**Figure S1:** Photograph showing 1 cm sections of rapid diagnostic test, circled in yellow, utilized in DNA extraction protocol.

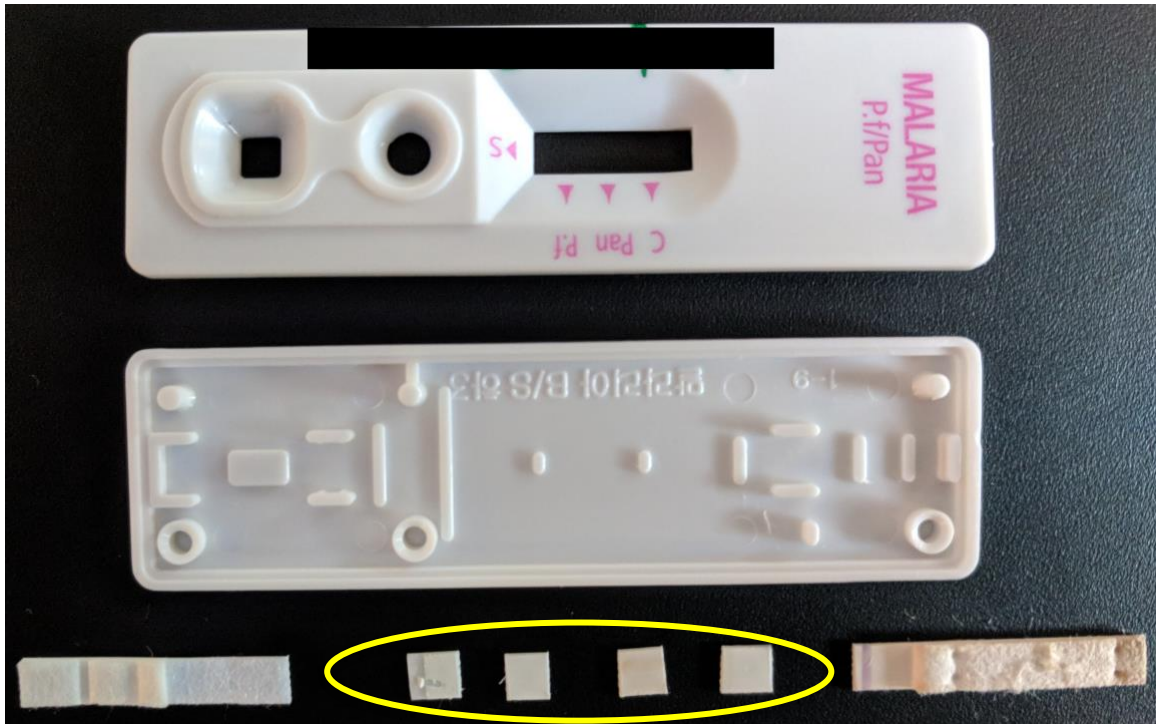

**Figure S2:** Summary of library construction process and final library structure

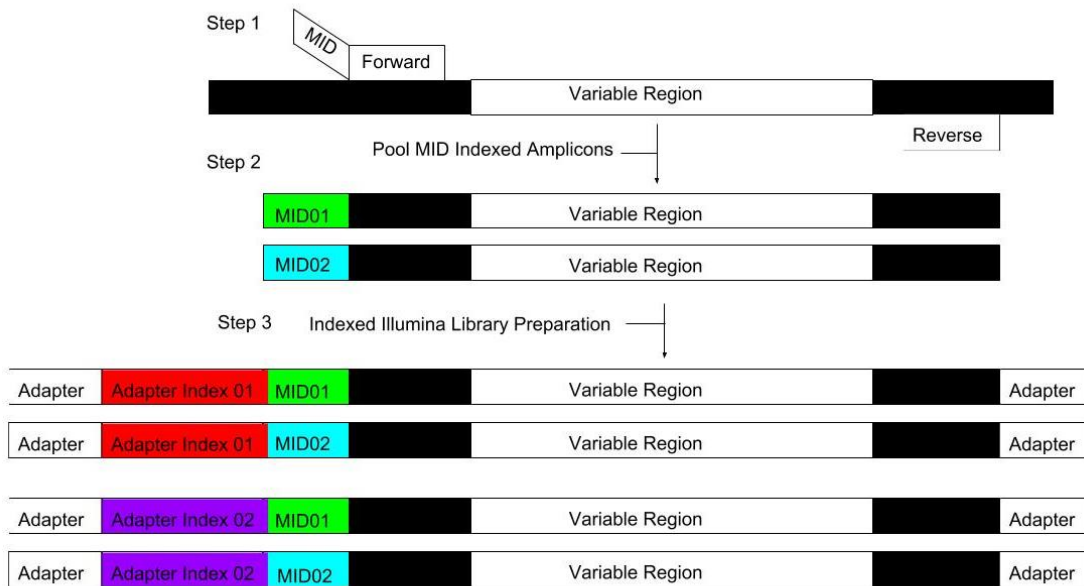

**Figure S3:** Allele frequencies in the five control mixtures. The number of reads per control were as follows: *Control 1* – 10,737 and 8658 reads, *Control 2* – 5,319 and 5,324 reads, *Control 3* – 6,031 and 7,705 reads, *Control 4* – 13,076 and 11,781 reads, *Control 5* – 4,331 and 7,184 reads.

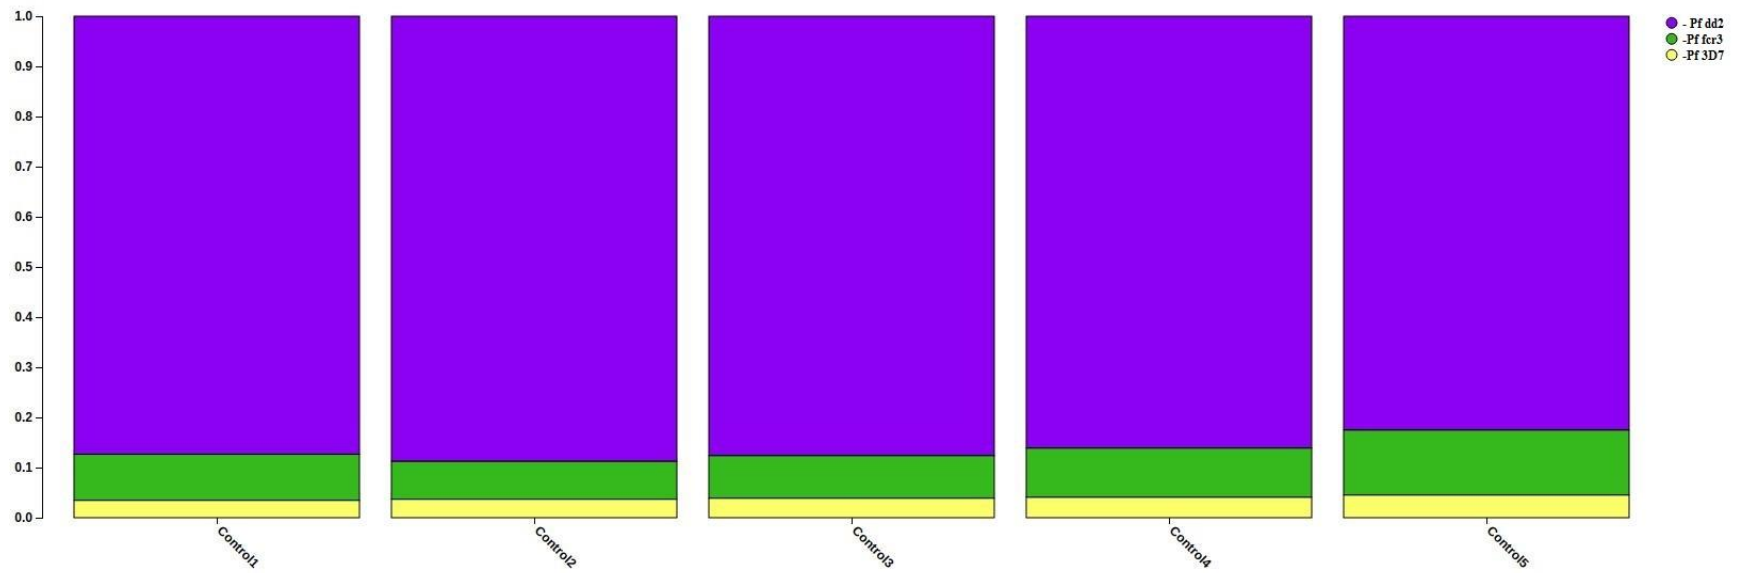

**Figure S4: Estimated *ama1* allele frequencies by cloning/Sanger sequencing and deep sequencing in a three-strain (dd2, fcr3, and 3D7) control mixture.** The three strains were mixed together in varying frequencies. A total of 22 colonies were Sanger sequenced. For deep sequencing, *ama1* amplicons were generated in quintuplicate and a total of 80,971 reads passed quality filtering and were used for haplotype determination. Estimated allele frequencies by cloning and Sanger sequencing were dd2=0.64, fcr3=0.27 and 3d7=0.09. Estimated allele frequencies by deep sequencing were dd2=0.85, fcr3=0.10 and 3d7=0.04. The bootstrap method with 1000 replicate bootstraps was used to estimate 25% and 97.5% confidence intervals for both sequencing results.

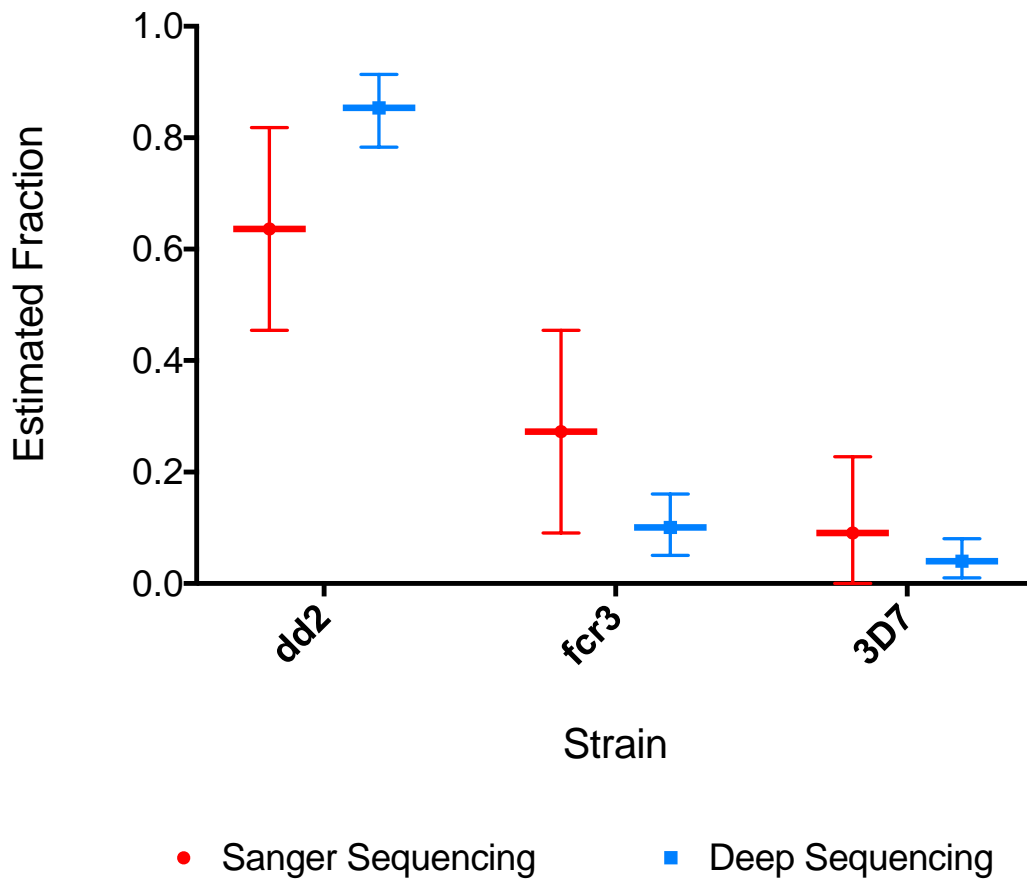

**Figure S5:** Total read depth of each sample stratified by multiplicity of infection (MOI)

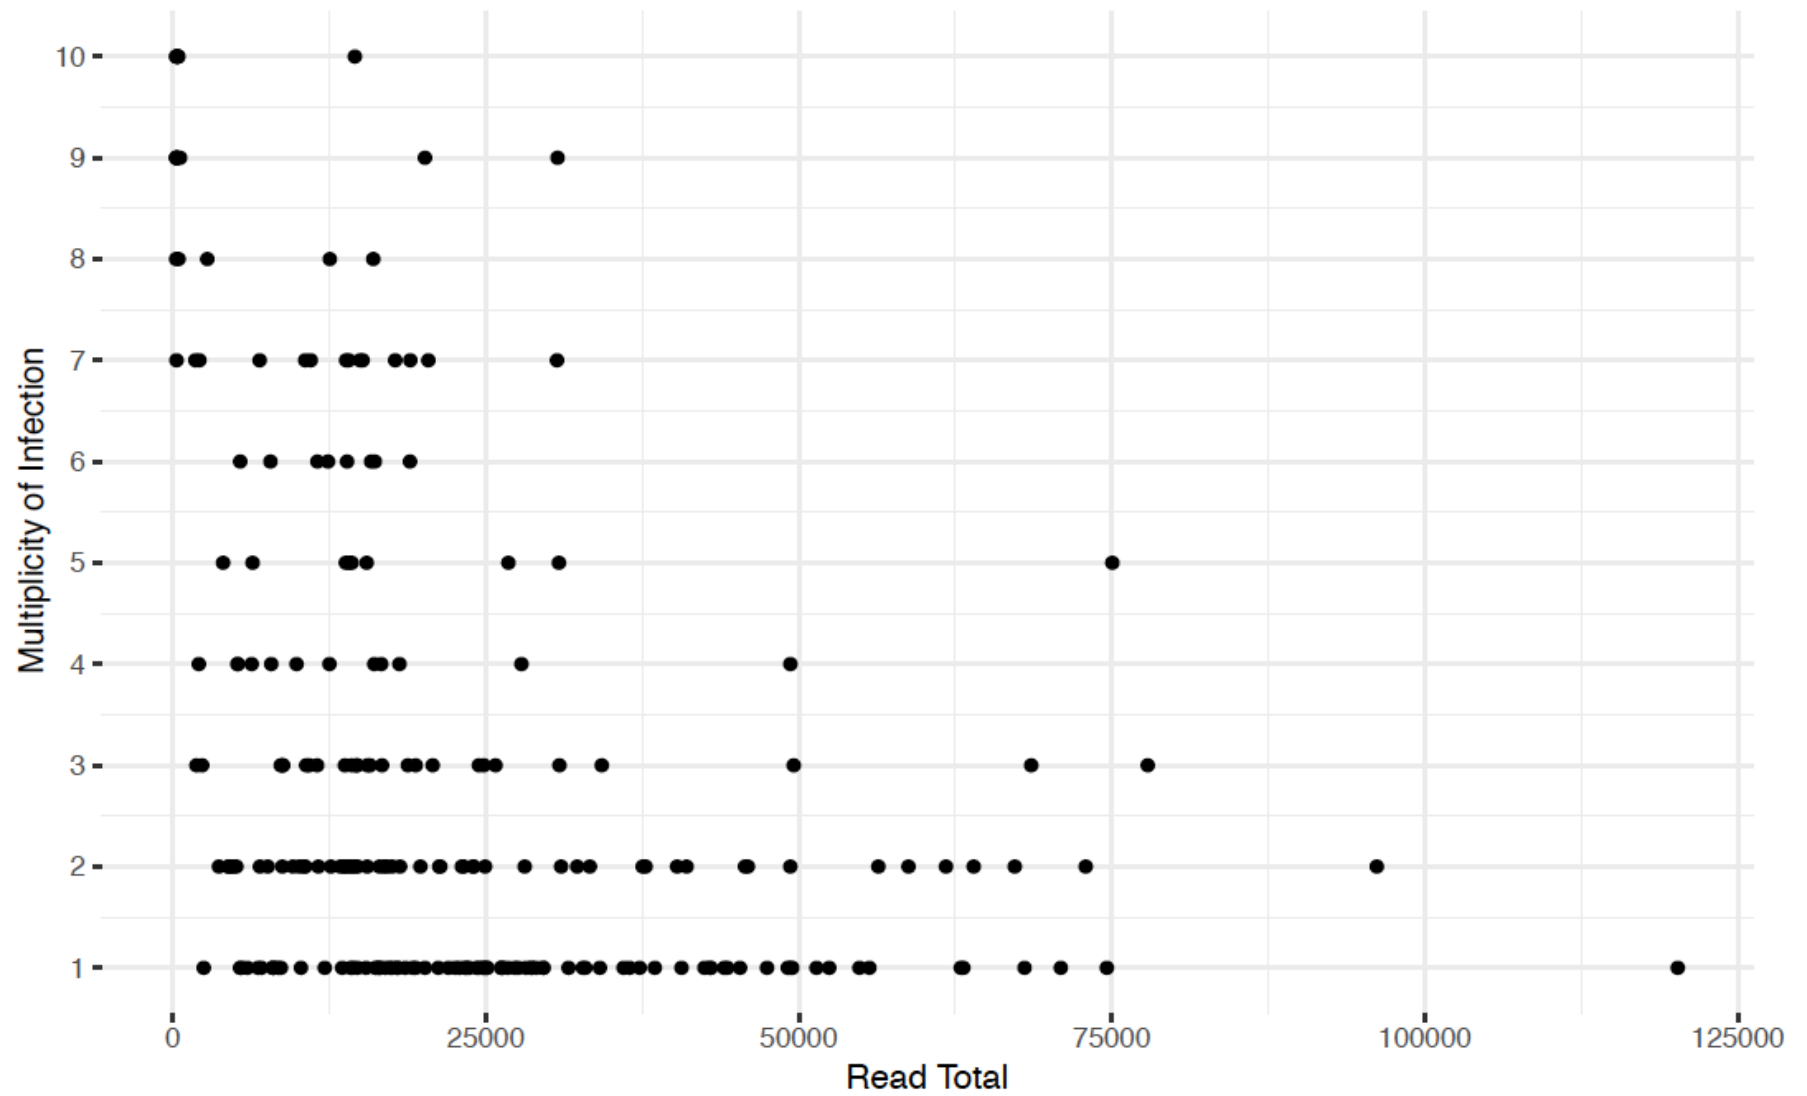



**Figure S6:** Histogram showing the absolute number of samples in which each haplotype (n=39) was found.

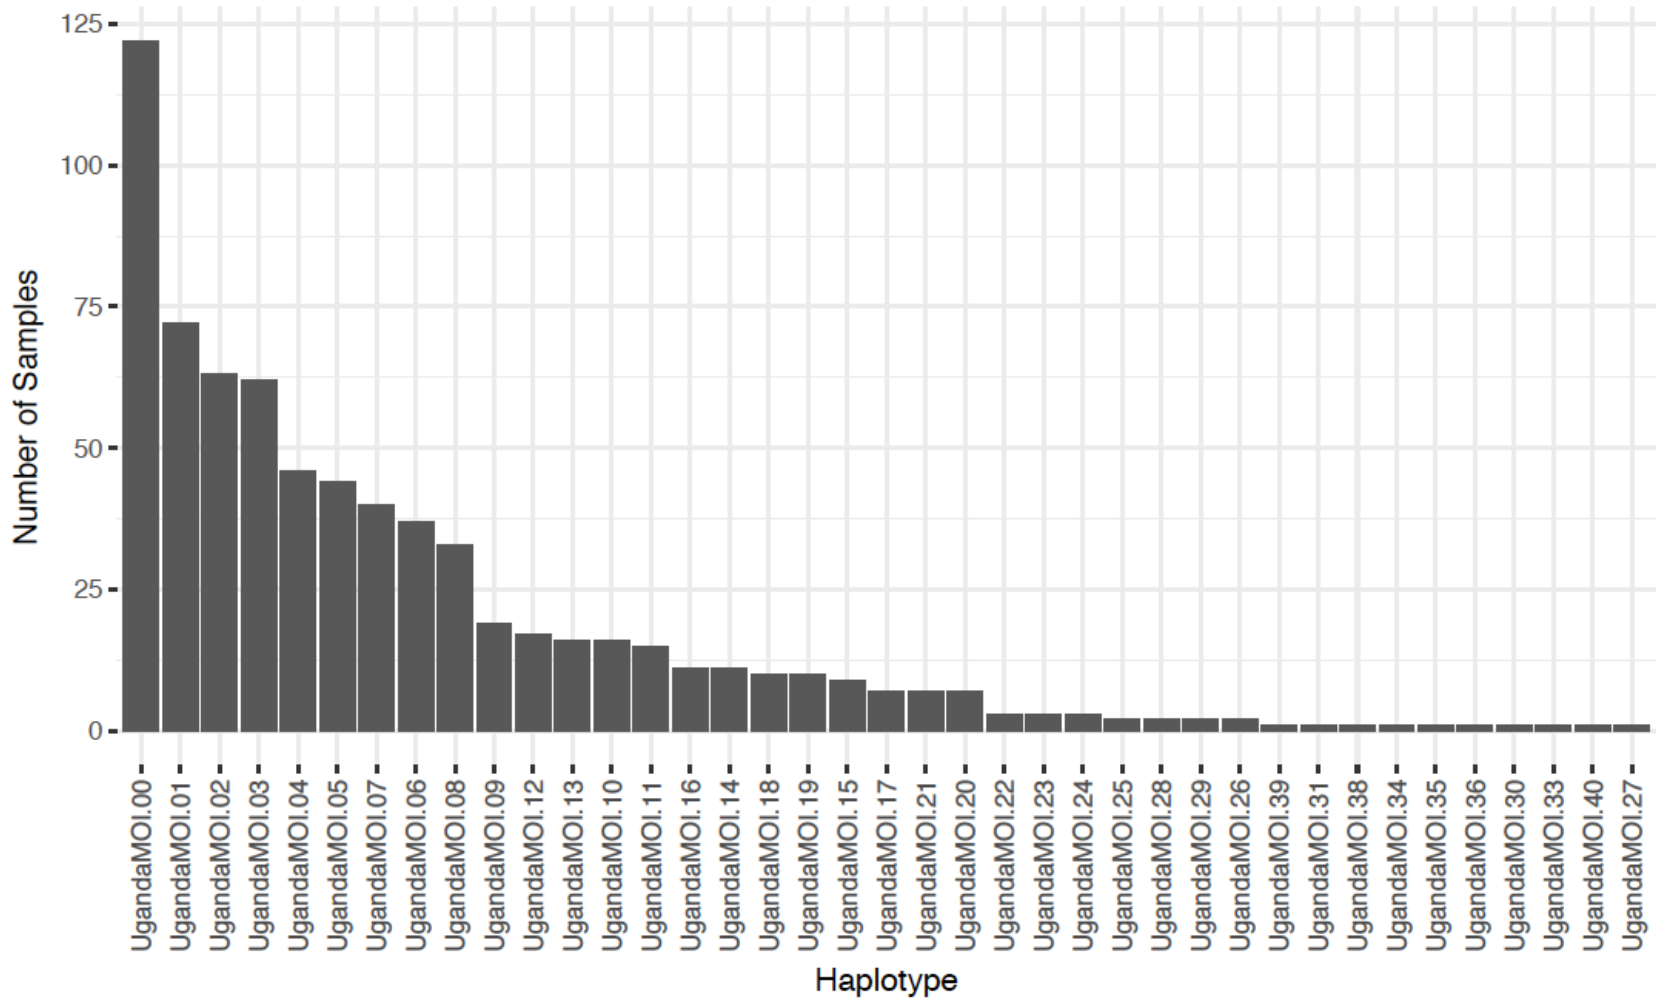

Supplement: 41598_2018_28534_MOESM1_ESM.pdf [file 41598_2018_28534_MOESM1_ESM.pdf]
